# Supplementary material for: PPN (poly-peri-naphthalene) film as a narrow-bandgap organic thermoelectric material
Source: Royal Society of Chemistry journal article supplement (doi:10.1039/c7ta02431b), 2017-01-01
Supplement: c7ta02431b1.pdf [file c7ta02431b1.pdf]

*Supplementary Information*

**PPN (Poly-peri-naphthalene) Film as a Narrow—Band-Gap  
Organic Thermoelectric Material**

Jie Chen,<sup>ab</sup> Jiajia Zhang,<sup>ab</sup> Ye Zou,<sup>a</sup> Wei Xu<sup>\*a</sup> and Daoben Zhu<sup>\*a</sup>

<sup>a</sup> Beijing National Laboratory for Molecular Sciences, Key Laboratory of Organic Solids, Institute of Chemistry, Chinese Academy of Sciences, Beijing, 100190, China.

<sup>b</sup> University of Chinese Academy of Sciences, Beijing, 100049, China

\*Corresponding author: [wxu@iccas.ac.cn](mailto:wxu@iccas.ac.cn); [zhudb@iccas.ac.cn](mailto:zhudb@iccas.ac.cn)

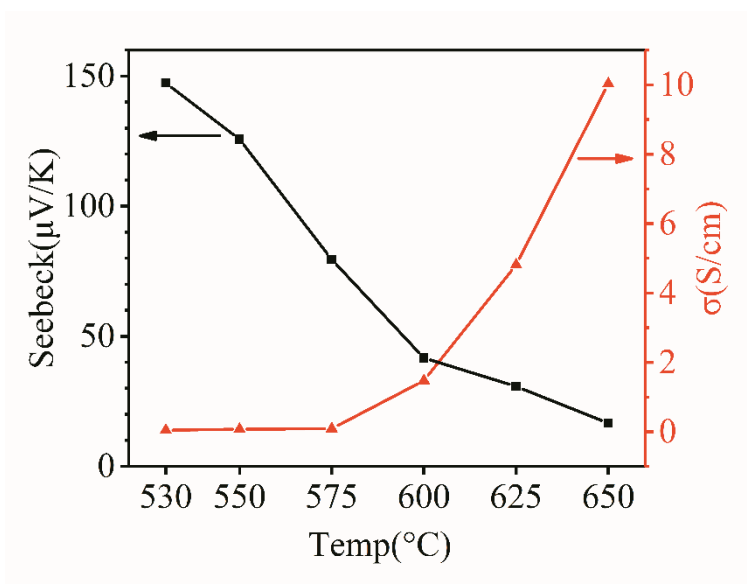

Figure S1 Seebeck coefficient and electrical conductivity of the films got at 530 $^{\circ}\text{C}$ , 550 $^{\circ}\text{C}$ , 575 $^{\circ}\text{C}$ , 600 $^{\circ}\text{C}$ , 625 $^{\circ}\text{C}$  and 650 $^{\circ}\text{C}$ .

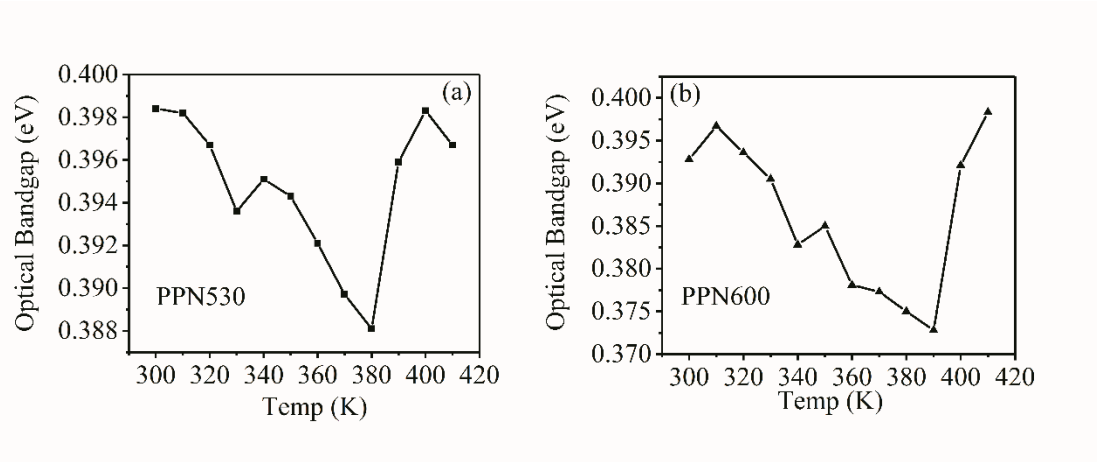

Figure S2 Optical bandgap verse temperature of PPN530 (a) and PPN600 (b).

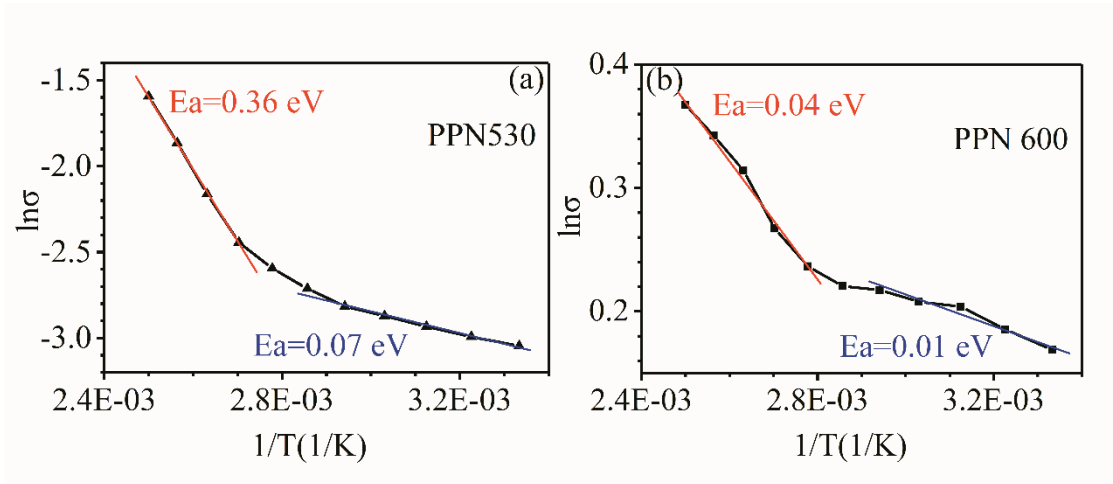

Figure S3 Plots of  $\ln\sigma$  (T) versus  $1/T$  of PPN530 (a) and PPN600 (b).
